# Supplementary material for: Nitrogen oxides (NO and NO2) pollution in the Accra metropolis: Spatiotemporal patterns and the role of meteorology
Source: PubMed Central journal article supplement (PMC7611659; doi:10.1016/j.scitotenv.2021.149931), 2021-08-27
Supplement: EMS134135-supplement-Appendix.pdf [file EMS134135-supplement-Appendix.pdf]

705 **Appendix A. Supplementary data**

706

707 **Nitrogen oxides (NO and NO<sub>2</sub>) pollution in the Accra metropolis: Spatiotemporal patterns**  
708 **and the role of meteorology**

709

710 Jiayuan Wang<sup>1</sup>, Abosede Sarah Alli<sup>1</sup>, Sierra Clark<sup>2</sup>, Allison Hughes<sup>3</sup>, Majid Ezzati<sup>2,4,5,6</sup>, Andrew  
711 Beddows<sup>7</sup>, Jose Vallarino<sup>8</sup>, James Nimo<sup>3</sup>, Josephine Bedford-Moses<sup>3</sup>, Solomon Baah<sup>3</sup>, George  
712 Owusu<sup>9</sup>, Ernest Agyemang<sup>10</sup>, Frank Kelly<sup>4,7</sup>, Benjamin Barratt<sup>4,7</sup>, Sean Beevers<sup>4</sup>, Samuel Agyei-  
713 Mensah<sup>10</sup>, Jill Baumgartner<sup>11,12</sup>, Michael Brauer<sup>13</sup>, Raphael E Arku<sup>1\*</sup>

714

715 <sup>1</sup>Department of Environmental Health Sciences, School of Public Health and Health Sciences,  
716 University of Massachusetts, Amherst, USA

717 <sup>2</sup>Department of Epidemiology and Biostatistics, School of Public Health, Imperial College,  
718 London, UK

719 <sup>3</sup>Department of Physics, University of Ghana, Legon, Ghana

720 <sup>4</sup>MRC Centre for Environment and Health, Imperial College London, London, UK

721 <sup>5</sup>Abdul Latif Jameel Institute for Disease and Emergency Analytics, Imperial College London,  
722 London, UK

723 <sup>6</sup>Regional Institute for Population Studies, University of Ghana, Accra, Ghana

724 <sup>7</sup>NIHR HPRU in Environmental Exposures and Health, Imperial College London, UK

725 <sup>8</sup>Harvard T.H. Chan School of Public Health, Boston, MA, USA

726 <sup>9</sup>Institute of Statistical, Social and Economic Research, University of Ghana, Legon, Ghana

727 <sup>10</sup>Department of Geography and Resource Development, University of Ghana, Legon, Ghana

728 <sup>11</sup>Institute for Health and Social Policy, McGill University, Montreal, Canada

729 <sup>12</sup>Department of Epidemiology, Biostatistics, and Occupational Health, McGill University,  
730 Montreal, Canada

731 <sup>13</sup>School of Population and Public Health, The University of British Columbia, Vancouver, Canada

732

733 \*Correspondence to:

734 Raphael E Arku

735 School of Public Health and Health Sciences

736 University of Massachusetts Amherst, MA, USA

737 E-mail: rarku@umass.edu

738

739 \*\*\* Color does not need to be used for any figures in print.

740

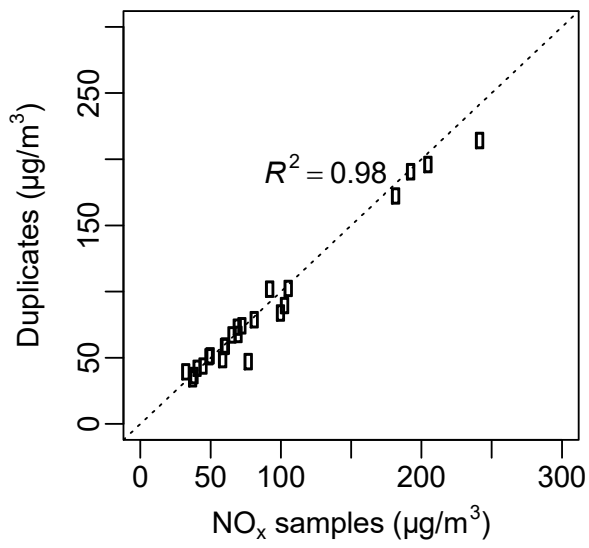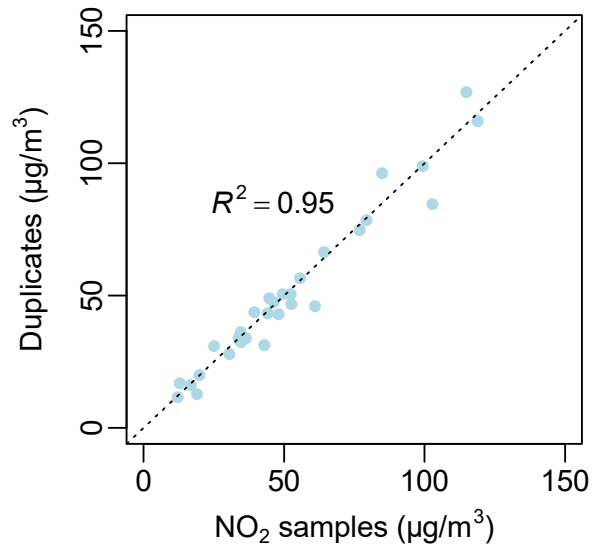

741

742

**Figure S1.** Correlation test between samples and duplicates.

743

744

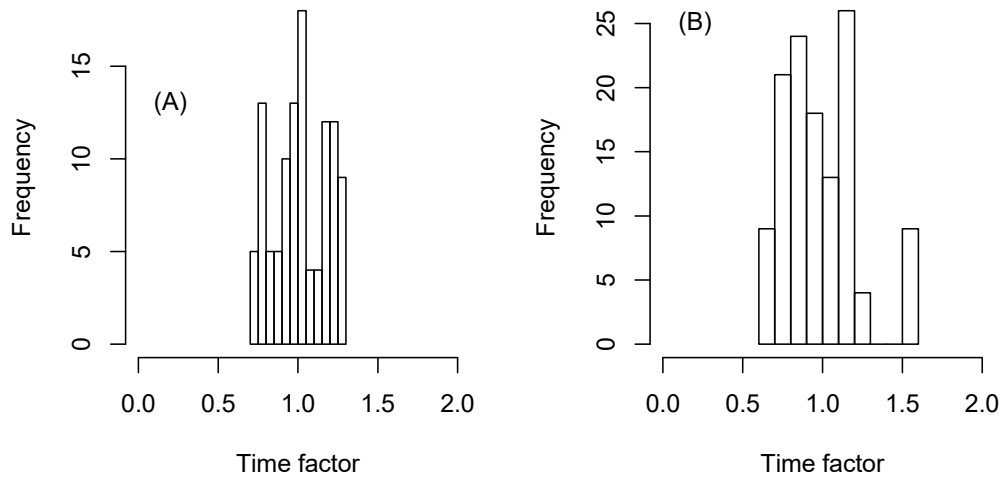

745

746 **Figure S2.** Histogram of time correction factor of NO (A) and NO<sub>2</sub> (B) for temporal adjustment.  
747

748

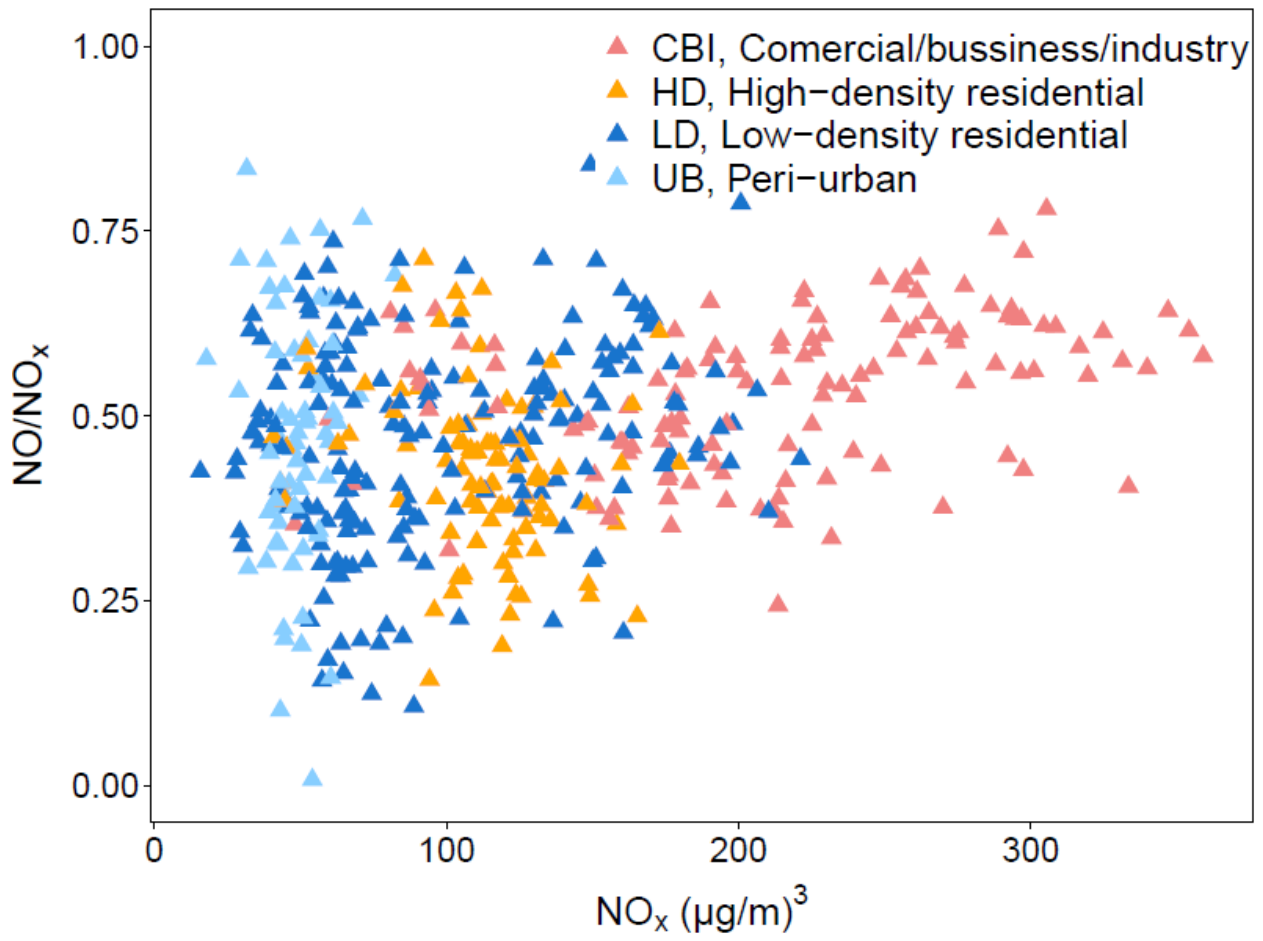

749

750

**Figure S3.** Scatter plot of NO/NO<sub>x</sub> ratio with NO<sub>x</sub> concentrations.

751

752

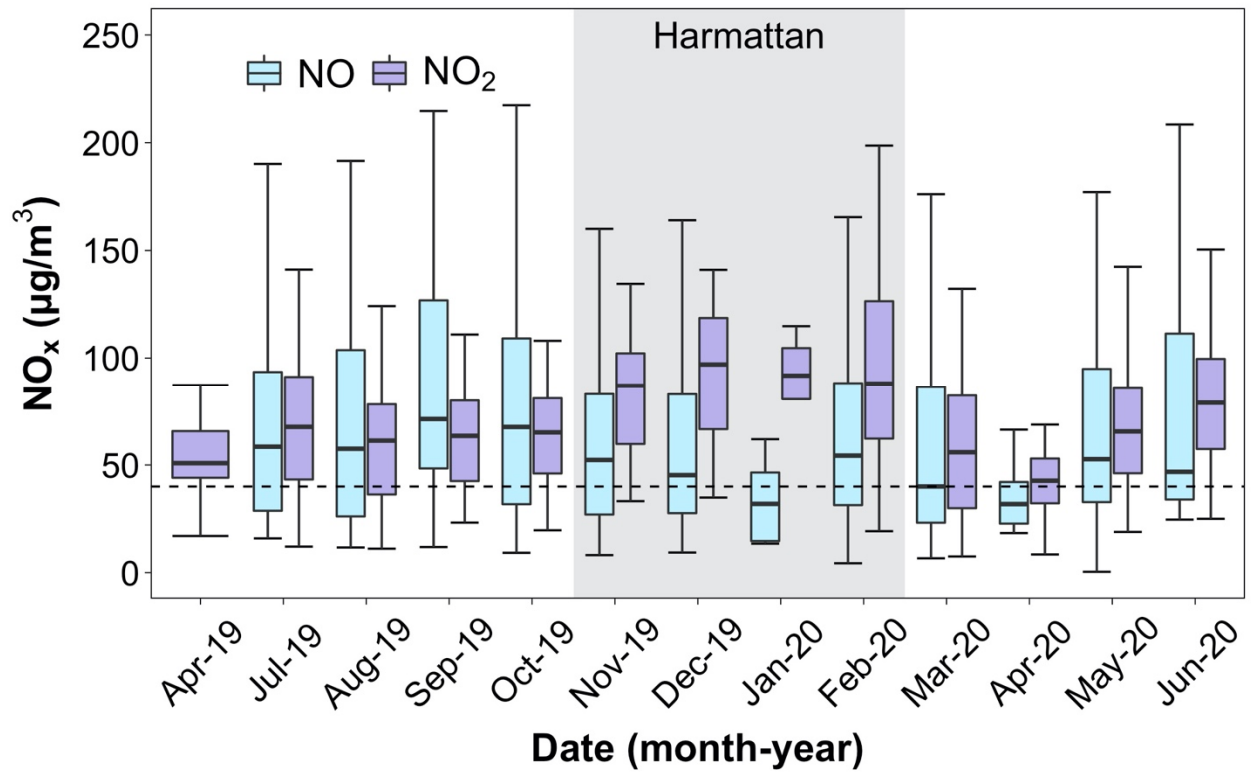

753

754

755

756 **Figure S4.** Monthly average concentrations of NO and NO<sub>2</sub> at all fixed sites. The dash line indicate

757 the WHO annual guideline of 40 µg/m<sup>3</sup> for NO<sub>2</sub>. Here, we included pilot NO<sub>2</sub> data collected in

758 April.

759

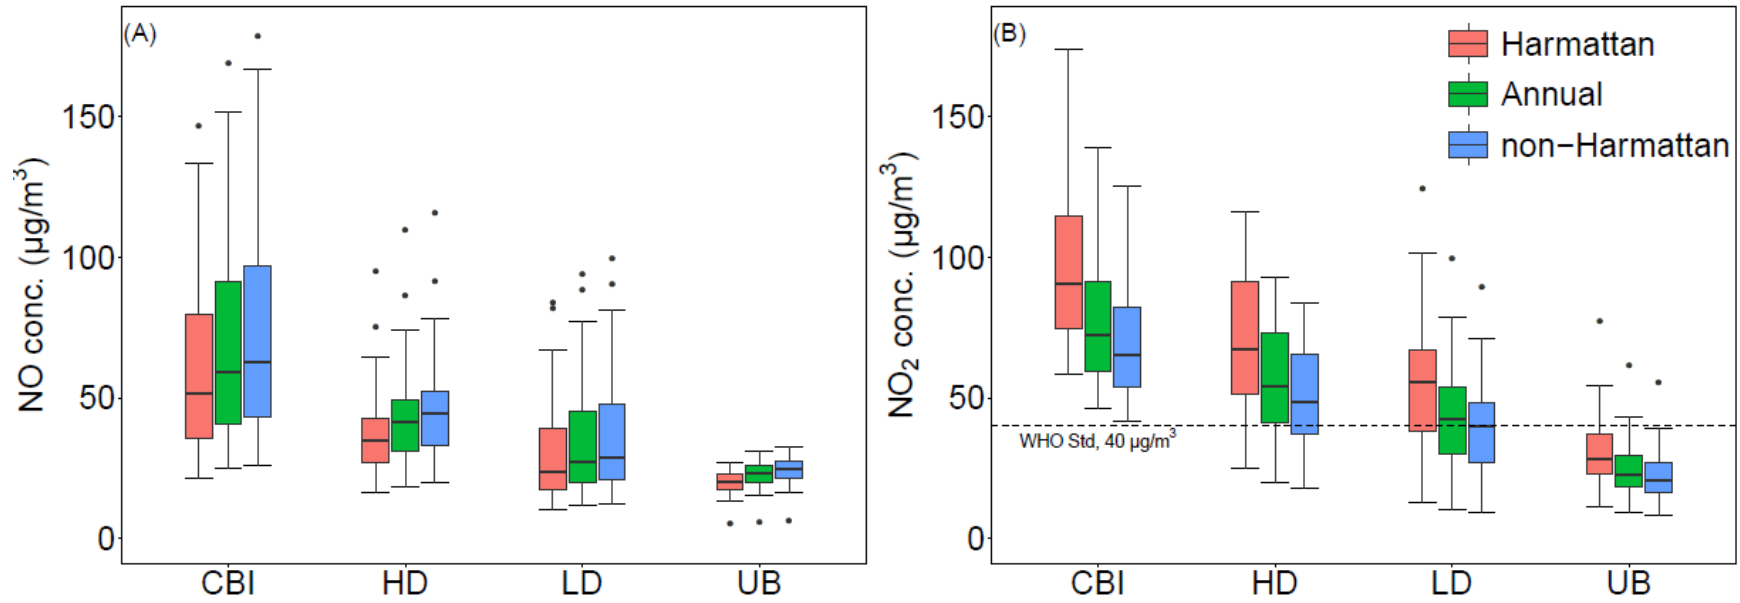

760

761 Figure S5. Annual and seasonal mean  $\text{NO}_2$  and NO concentrations by site-types: commercial/business/industry (CBI), high-density  
762 residential (HD), low-density residential (LD) and urban background (UB) sites. The input data represent seasonal and annual mean  
763 equivalents for all monitoring sites.

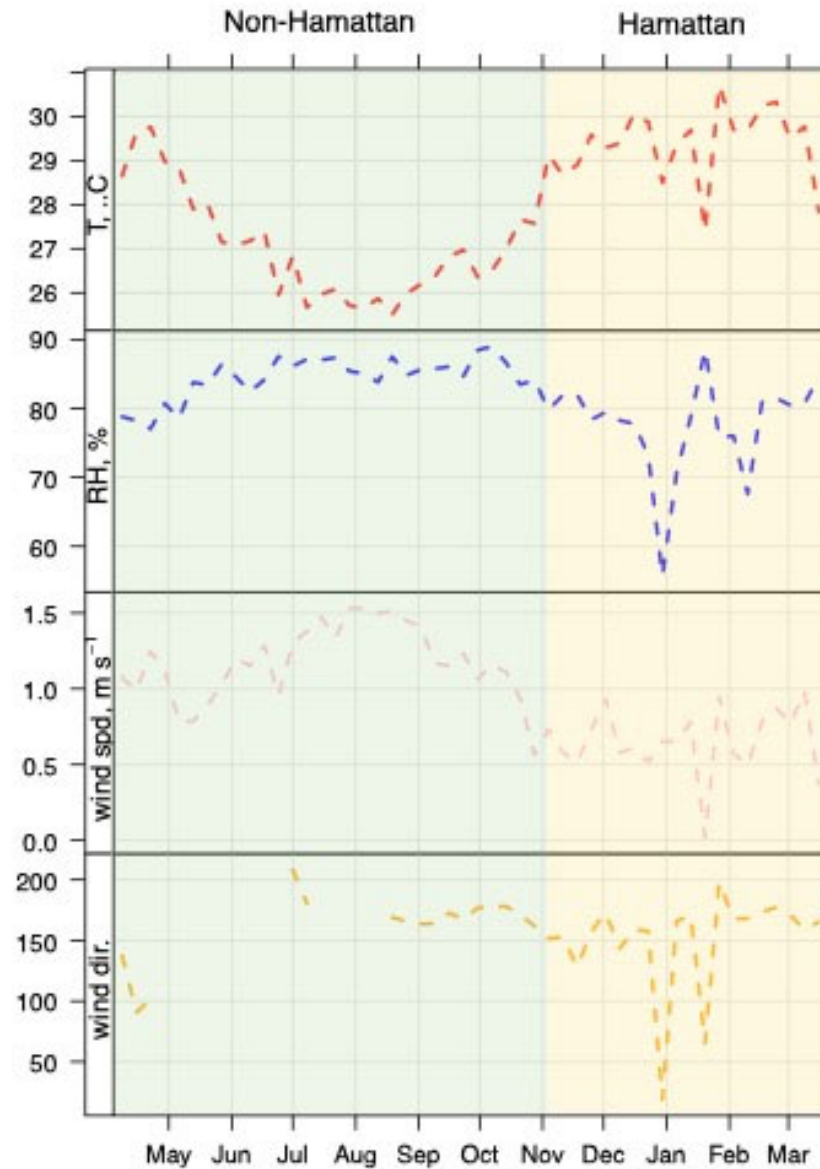

765

766 **Figure S6.** Time series of meteorological parameters (temperature, relative humidity,  
 767 wind speed and wind direction) in Accra from April 2019 to March 2020. The light green  
 768 shade covers non-Harmattan period, and the light orange shade covers Harmattan period.  
 769

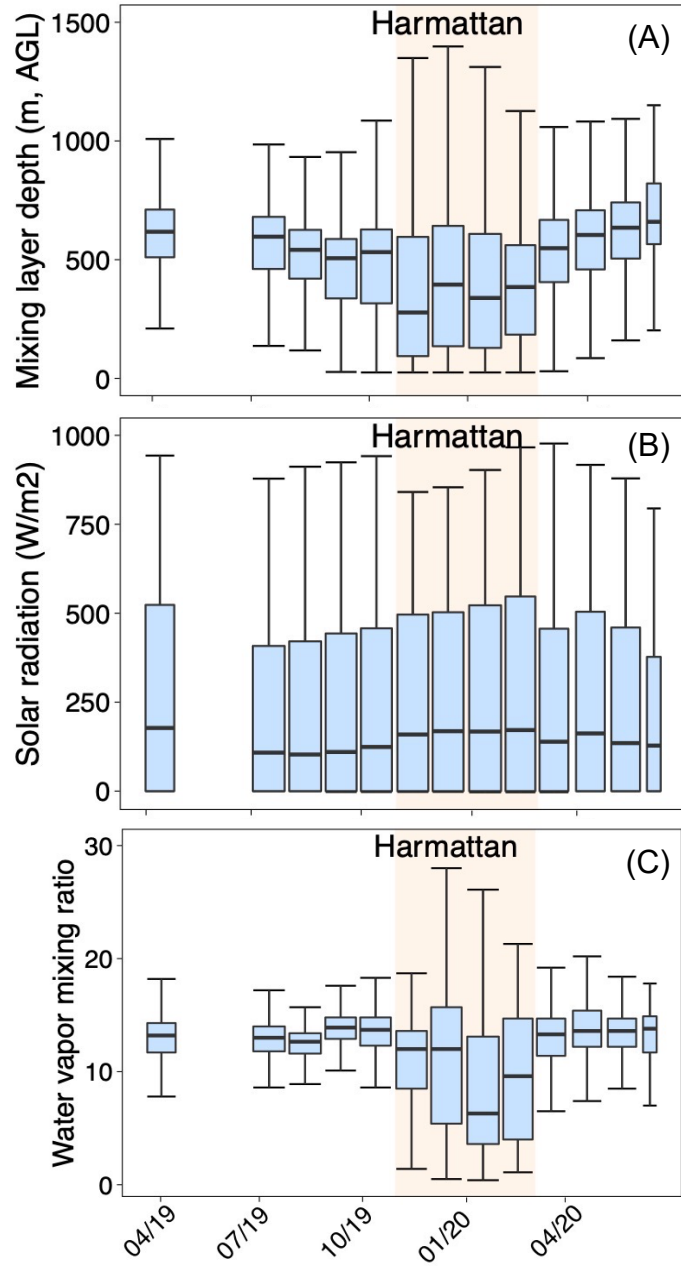

770

771 **Figure S7.** Monthly mixing layer depth (m, above ground level) (A) Incident solar  
 772 radiation, and (B) Water vapor mixing ratio (C) during the full campaign period. The line  
 773 in the box represents the median.  
 774  
 775



776

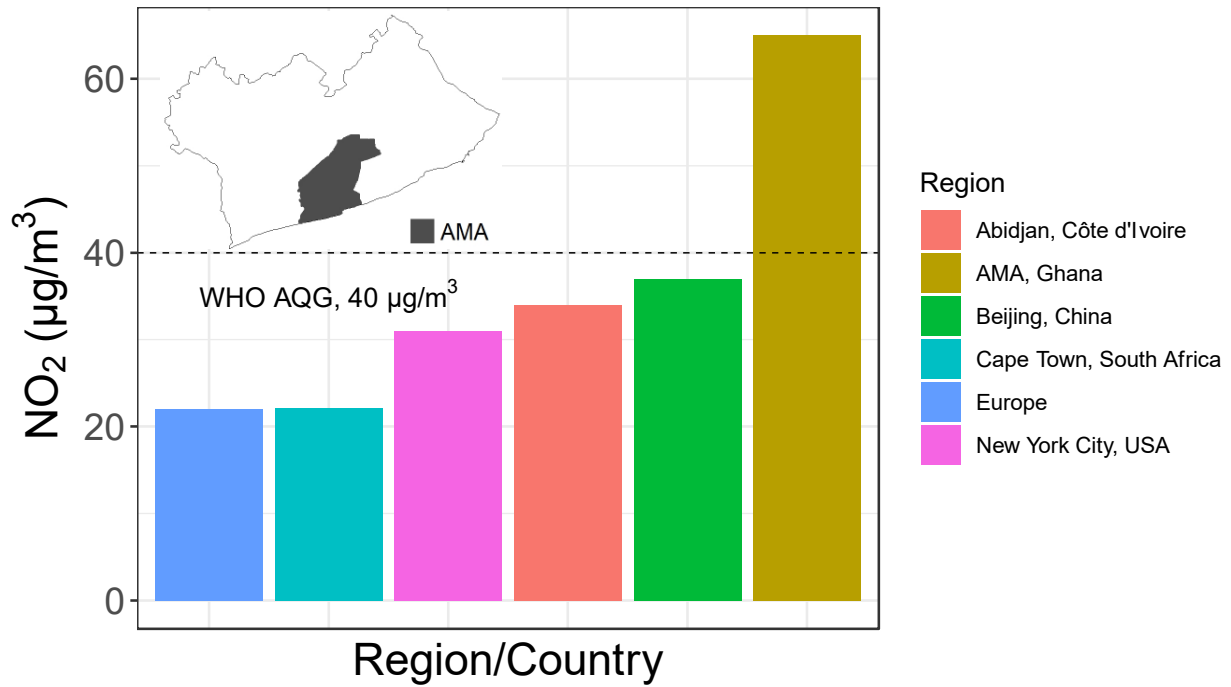

777

778 **Figure S8.** Comparison of annual mean NO<sub>2</sub> concentrations in Accra Metropolitan Area (AMA)  
779 and other cities/regions in the world. The dash line is the WHO guideline for annual  
780 concentrations of NO<sub>2</sub> (40 µg/m<sup>3</sup>).  
781

782  
783

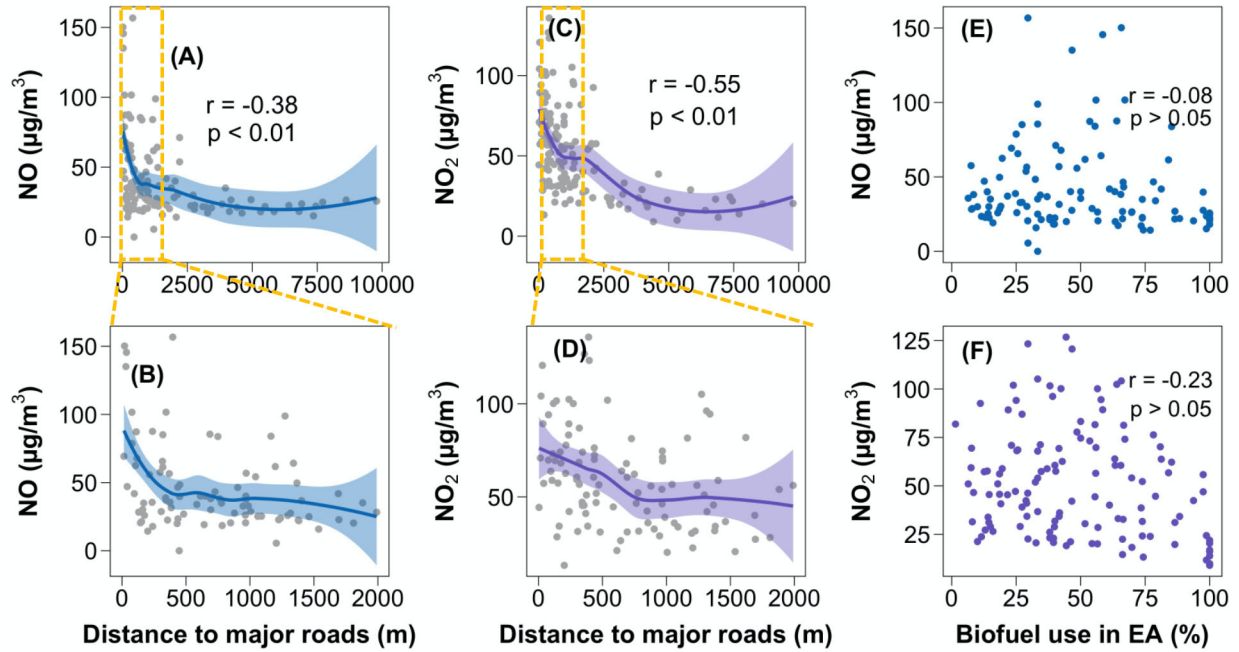

784  
785  
786  
787  
788  
789  
790  
791  
792  
793

**Figure S9.** Relationship between NO<sub>x</sub> concentrations and (A ~D) distance to major roads, and (E~F) biomass use percentage in enumeration area (EA) containing the monitoring locations. The smooth trend method is loess, and the shade areas are the standard errors. The road network data was downloaded from OpenStreetMap (2019). We caution that the 2010 census biomass use data may not reflect present usage (Ghana Statistic Service, 2010).
